# Supplementary material for: Density functional theory study of Li binding to graphene
Source: Royal Society of Chemistry journal article supplement (doi:10.1039/c6ra00101g), 2016-01-01
Supplement: c6ra00101g1.pdf [file c6ra00101g1.pdf]

## Electronic supplementary information

### Density functional theory study of Li binding to graphene

GuangminYang<sup>a,b</sup>, Xiaofeng Fan<sup>a,\*</sup>, ZhicongLiang<sup>a</sup>, QiangXu<sup>c</sup>, WeitaoZheng<sup>a,†</sup>

<sup>a</sup> College of Materials Science and Engineering, Key Laboratory of Automobile Materials of MOE, Jilin University, Changchun 130012, People's Republic of China

<sup>b</sup> College of Physics, Changchun Normal University, Changchun 130032, People's Republic of China

<sup>c</sup> College of Prospecting and Surveying Engineering, Changchun Institute of Technology, Changchun 130032, People's Republic of China

Corresponding author E-mail:

\* [xffan@jlu.edu.cn](mailto:xffan@jlu.edu.cn) (X.F. Fan); † [wzheng@jlu.edu.cn](mailto:wzheng@jlu.edu.cn) (W.T. Zheng)

We have provided the distribution of charge density and density of states (DOS) of individual lithium clusters ( $\text{Li}_2$ ,  $\text{Li}_3$ ,  $\text{Li}_4$ ), and the detailed atomic coordinates of the adsorbed geometries in Figure 1.

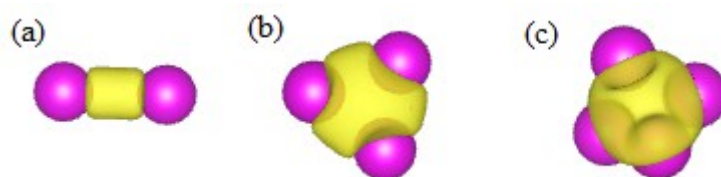

Fig.S1 The distribution of charge densities for individual lithium clusters including (a)  $\text{Li}_2$ , (b)  $\text{Li}_3$  and (c)  $\text{Li}_4$ .

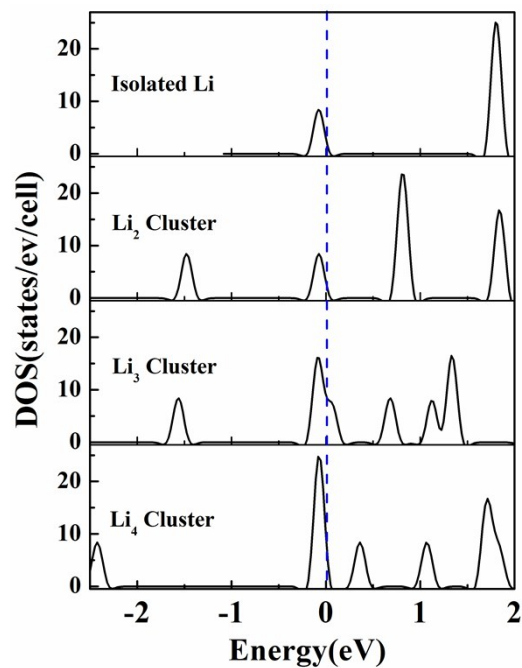

Fig.S2 The density of states (DOS) of  $\text{Li}_2$ ,  $\text{Li}_3$  and  $\text{Li}_4$  clusters, corresponding to Fig. S1(a)-(c), respectively. Note that the DOS is the sum of spin-up and spin-down bands.

The xyz coordinates of the adsorbed geometries in Figure1. Note that the formation is with the POSCAR of VASP.

#### POSCAR of $\text{LiC}_6$

1.0

|              |              |               |
|--------------|--------------|---------------|
| 4.2677998543 | 0.0000000000 | 0.0000000000  |
| 2.1338999271 | 3.6960230921 | 0.0000000000  |
| 0.0000000000 | 0.0000000000 | 18.0000000000 |

C Li

6 1

Direct

|             |             |             |
|-------------|-------------|-------------|
| 0.472550005 | 0.872940004 | 0.489300013 |
| 0.805890024 | 0.206269994 | 0.489300013 |
| 0.139219999 | 0.539610028 | 0.489300013 |
| 0.472550005 | 0.206269994 | 0.489300013 |
| 0.805890024 | 0.539610028 | 0.489300013 |
| 0.139219999 | 0.872940004 | 0.489300013 |
| 0.472550005 | 0.539610028 | 0.592630029 |

## POSCAR of Li<sub>2</sub>C<sub>12</sub>

1.0

|                    |                    |                     |
|--------------------|--------------------|---------------------|
| 4.9279999733000004 | 0.0000000000000000 | 0.0000000000000000  |
| 3.6960000991999999 | 6.4016599565999996 | 0.0000000000000000  |
| 0.0000000000000000 | 0.0000000000000000 | 18.0000000000000000 |

C Li  
12 2

Direct

|                    |                    |                    |
|--------------------|--------------------|--------------------|
| 0.8401687313235513 | 0.1846184246966160 | 0.5499516918271468 |
| 0.1724397848171151 | 0.4073659054290175 | 0.5496698618692619 |
| 0.3389214614034444 | 0.1848933585778880 | 0.5493912466246940 |
| 0.6732682067712474 | 0.4072336366826619 | 0.5502969997308824 |
| 0.8394809586868348 | 0.5188614103060090 | 0.5498468039528390 |
| 0.1717577165214550 | 0.7415200613583011 | 0.5498560945560769 |
| 0.3388075064681644 | 0.5187689860776388 | 0.5499836058653003 |
| 0.6729669808512000 | 0.7412379587731479 | 0.5489227715479430 |
| 0.8396380138226363 | 0.8519547146212929 | 0.5498021895677496 |
| 0.1722751901170483 | 0.0741875030168018 | 0.5499135513694213 |
| 0.3386370393102851 | 0.8525705451318899 | 0.5489884256240387 |
| 0.6731716135949100 | 0.0736213281888780 | 0.5493390822969531 |
| 0.5094959025847317 | 0.6716242497039531 | 0.6560926088856434 |
| 0.4974309027273662 | 0.2742019534359059 | 0.6537448122820493 |

## POSCAR of Li<sub>3</sub>C<sub>18</sub>

1.0

|                    |                    |                     |
|--------------------|--------------------|---------------------|
| 7.3920001983999999 | 0.0000000000000000 | 0.0000000000000000  |
| 3.6960000991999999 | 6.4016599565999996 | 0.0000000000000000  |
| 0.0000000000000000 | 0.0000000000000000 | 18.0000000000000000 |

C Li  
18 3

Direct

|                    |                    |                    |
|--------------------|--------------------|--------------------|
| 0.9070438657435957 | 0.1259980851836389 | 0.5904310261814203 |
| 0.1286761358927109 | 0.3482126471627822 | 0.5912732143799246 |
| 0.2394877152749544 | 0.1266588981445622 | 0.5910487234392434 |
| 0.4614951530733649 | 0.3486025580330789 | 0.5898482583630766 |
| 0.5726178823434154 | 0.1261081546156007 | 0.5903437636754632 |
| 0.7956980639148767 | 0.3485553681838169 | 0.5897384167202659 |
| 0.9070445806066516 | 0.4598279733621453 | 0.5904990460830675 |
| 0.1278961348195509 | 0.6824753424590142 | 0.5898344459411433 |
| 0.2389150192000358 | 0.4597571162718452 | 0.5904112178238208 |
| 0.4615847368005745 | 0.6827658648181867 | 0.5898797207985496 |
| 0.5730397074340416 | 0.4599318270889441 | 0.5883007203884247 |
| 0.7953328357203944 | 0.6825302762015255 | 0.5898014762534913 |
| 0.9061631740735407 | 0.7933689396974160 | 0.5905509416356622 |

|                    |                    |                    |
|--------------------|--------------------|--------------------|
| 0.1287669602396164 | 0.0157932598784001 | 0.5910975879782470 |
| 0.2389304465989071 | 0.7941153982910194 | 0.5904167500773099 |
| 0.4609513721061447 | 0.0160219029062958 | 0.5909944980261770 |
| 0.5726430026287446 | 0.7941951358287369 | 0.5901046766270213 |
| 0.7953038758914985 | 0.0150551073773286 | 0.5900160645641819 |
| 0.3038172493472047 | 0.5903009753226272 | 0.7003683337787905 |
| 0.7056044517727571 | 0.1990438271310282 | 0.6994419156506595 |
| 0.6958276615174270 | 0.5999813770420275 | 0.6995188316140357 |

POSCAR of \*Li<sub>3</sub>C<sub>18</sub>

1.0

|                    |                    |                     |
|--------------------|--------------------|---------------------|
| 7.3920001983999999 | 0.0000000000000000 | 0.0000000000000000  |
| 3.6960000991999999 | 6.4016599565999996 | 0.0000000000000000  |
| 0.0000000000000000 | 0.0000000000000000 | 18.0000000000000000 |

C Li

18 3

Direct

|                    |                    |                    |
|--------------------|--------------------|--------------------|
| 0.9079068376926216 | 0.1260353480914915 | 0.5909205868303644 |
| 0.1280290449536423 | 0.3481683311453665 | 0.5909898301055705 |
| 0.2398644200027533 | 0.1264405976513885 | 0.5908327579240762 |
| 0.4616407734667831 | 0.3482549875378851 | 0.5906514606140760 |
| 0.5730013344546379 | 0.1248911992876884 | 0.5909222867476913 |
| 0.7970355518640488 | 0.3489265243070960 | 0.5909213904252866 |
| 0.9073120282352178 | 0.4603617289759043 | 0.5909874997550659 |
| 0.1274314529899883 | 0.6824807557151757 | 0.5909232054326097 |
| 0.2383098066131879 | 0.4596049412778669 | 0.5909204100001872 |
| 0.4623266484379229 | 0.6836231530823866 | 0.5909186858923405 |
| 0.5736838885300273 | 0.4603025383402723 | 0.5906450164912513 |
| 0.7954869664931863 | 0.6820695098719298 | 0.5908360340668750 |
| 0.9058105629795605 | 0.7924131710252311 | 0.5911125154444505 |
| 0.1295328574369847 | 0.0161236281722736 | 0.5911155433766808 |
| 0.2394578570437389 | 0.7945034095124939 | 0.5909199591400238 |
| 0.4615720525893039 | 0.0146286459186342 | 0.5909894064489976 |
| 0.5737533882738219 | 0.7939154349845481 | 0.5909877437436108 |
| 0.7959051619369291 | 0.0140246604966734 | 0.5909240106300473 |
| 0.3485392463691710 | 0.5734631039416556 | 0.6961709114488102 |
| 0.6868335872806526 | 0.2351731437684279 | 0.6961746430876303 |
| 0.5176665253558568 | 0.4043352908956308 | 0.8398957343943323 |

POSCAR of Li<sub>4</sub>C<sub>24</sub>

1.0

|              |              |               |
|--------------|--------------|---------------|
| 9.8559999466 | 0.0000000000 | 0.0000000000  |
| 3.6960000992 | 6.4016599566 | 0.0000000000  |
| 0.0000000000 | 0.0000000000 | 18.0000000000 |

| C           | Li          |             |  |
|-------------|-------------|-------------|--|
| 24          | 4           |             |  |
| Direct      |             |             |  |
| 0.909579992 | 0.276019990 | 0.364140004 |  |
| 0.075819999 | 0.497689992 | 0.364050001 |  |
| 0.158889994 | 0.276360005 | 0.364179999 |  |
| 0.325819999 | 0.497759998 | 0.364600003 |  |
| 0.409359992 | 0.275209993 | 0.364100009 |  |
| 0.576900005 | 0.497599989 | 0.365009993 |  |
| 0.660570025 | 0.274830014 | 0.364450008 |  |
| 0.827040017 | 0.497520000 | 0.364109993 |  |
| 0.909510016 | 0.609109998 | 0.363739997 |  |
| 0.075220004 | 0.832159996 | 0.363649994 |  |
| 0.158450007 | 0.609489977 | 0.364219993 |  |
| 0.325670004 | 0.832509995 | 0.364560008 |  |
| 0.409520000 | 0.609319985 | 0.364289999 |  |
| 0.576889992 | 0.831480026 | 0.363539994 |  |
| 0.660390019 | 0.609120011 | 0.364309996 |  |
| 0.826590002 | 0.831139982 | 0.363750011 |  |
| 0.908879995 | 0.943109989 | 0.363950014 |  |
| 0.075599998 | 0.165849999 | 0.364179999 |  |
| 0.158419997 | 0.943979979 | 0.364289999 |  |
| 0.325659990 | 0.165079996 | 0.364430010 |  |
| 0.409280002 | 0.943729997 | 0.364109993 |  |
| 0.576900005 | 0.163760006 | 0.363599986 |  |
| 0.660380006 | 0.942059994 | 0.363799989 |  |
| 0.826799989 | 0.164389998 | 0.364360005 |  |
| 0.216250002 | 0.738089979 | 0.467850000 |  |
| 0.505129993 | 0.740869999 | 0.468400002 |  |
| 0.504320025 | 0.350309998 | 0.468360007 |  |
| 0.410239995 | 0.608500004 | 0.610430002 |  |

POSCAR of Li<sub>5</sub>C<sub>30</sub>

1.0

|              |               |               |
|--------------|---------------|---------------|
| 7.3920001984 | 0.0000000000  | 0.0000000000  |
| 6.1599998474 | 10.6694327103 | 0.0000000000  |
| 0.0000000000 | 0.0000000000  | 18.0000000000 |

| C           | Li          |             |  |
|-------------|-------------|-------------|--|
| 30          | 5           |             |  |
| Direct      |             |             |  |
| 0.399450004 | 0.864510000 | 0.346769989 |  |
| 0.621860027 | 0.997070014 | 0.346340001 |  |
| 0.732949972 | 0.864269972 | 0.346729994 |  |
| 0.955429971 | 0.997150004 | 0.346049994 |  |

|             |             |             |
|-------------|-------------|-------------|
| 0.065669999 | 0.864340007 | 0.346089989 |
| 0.288470000 | 0.997470021 | 0.346500009 |
| 0.399859995 | 0.063579999 | 0.346210003 |
| 0.622309983 | 0.196640000 | 0.344060004 |
| 0.733420014 | 0.063450001 | 0.345820010 |
| 0.956080019 | 0.196640000 | 0.345169991 |
| 0.066560000 | 0.063730001 | 0.345770001 |
| 0.288850009 | 0.196740001 | 0.345649987 |
| 0.399879992 | 0.263330013 | 0.343930006 |
| 0.622229993 | 0.397350013 | 0.340559989 |
| 0.733349979 | 0.263790011 | 0.343809992 |
| 0.955540001 | 0.397280008 | 0.344370008 |
| 0.067010000 | 0.263489991 | 0.345429987 |
| 0.288480014 | 0.397460014 | 0.343459994 |
| 0.399419993 | 0.464289993 | 0.340680003 |
| 0.621519983 | 0.598010004 | 0.342489988 |
| 0.733099997 | 0.463970006 | 0.342139989 |
| 0.954879999 | 0.597809970 | 0.345910013 |
| 0.066100001 | 0.464150012 | 0.344689995 |
| 0.288199991 | 0.597670019 | 0.342689991 |
| 0.399370015 | 0.664680004 | 0.342729986 |
| 0.621540010 | 0.798020005 | 0.346879989 |
| 0.732580006 | 0.664529979 | 0.345849991 |
| 0.954710007 | 0.797930002 | 0.345950007 |
| 0.065629996 | 0.664810002 | 0.345259994 |
| 0.288010001 | 0.797850013 | 0.345829993 |
| 0.226630002 | 0.518639982 | 0.450459987 |
| 0.510569990 | 0.434549987 | 0.579200029 |
| 0.790530026 | 0.357230008 | 0.450830013 |
| 0.517000020 | 0.671159983 | 0.457800001 |
| 0.507499993 | 0.235440001 | 0.464370012 |
